# Supplementary material
Source: Springer Nature journal article supplement (https://www.springermedizin.de/resource/supplementary/13045_2013_327_MOESM5_ESM.pdf/9661132)
Supplement: MOESM5 [file 9661132]

**Table 1 Selected Histone Deacetylase Inhibitors**

| Name                  | Chemical Class         | Formula                                                                             | Target        | Number AML Trials |                             |
|-----------------------|------------------------|-------------------------------------------------------------------------------------|---------------|-------------------|-----------------------------|
|                       |                        |                                                                                     |               | Open/Total        | + Azacytidine<br>Open/Total |
| Phenylbutyrate        | Short fatty acid chain | 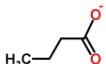   | Pan-inhibitor | 0/6               | 0                           |
| Valproic acid         | Short fatty acid chain |    | Class I/IIa   | 5/14              | 1/7                         |
| Vorinostat (SAHA)     | Hydroamic acid         |   | Pan-inhibitor | 8/25              | 2/4                         |
| Belinostat (PXD101)   | Hydroamic acid         |  | Pan-inhibitor | 1/4               | 0/1                         |
| Panobinostat (LBH589) | Hydroamic acid         |  | Pan-inhibitor | 7/11              | 2/3                         |

|                            |                     |                                                                                     |               |     |     |
|----------------------------|---------------------|-------------------------------------------------------------------------------------|---------------|-----|-----|
| Trichostatin A             | Hydroamic acid      | 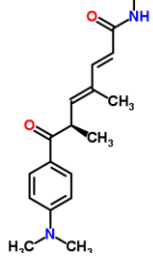   | Pan-inhibitor | 0   | 0   |
| Givinostat (ITF2375)       | Hydroamic acid      |    | Pan-inhibitor | 0   | 0   |
| Mocetinostat (MGCD0103)    | Benzamide           |    | Class I/IV    | 0/3 | 0/1 |
| Entinostat (MS275-SNDX275) | Benzamide           |   | Class I       | 2/7 | 1/3 |
| Romidepsin (Depsipeptide)  | Cyclic tetrapeptide |  | Class I       | 0/5 | 0/1 |
| Trapoxin B                 | Cyclic tetrapeptide |  | Class I/IIa   | 0   | 0   |

Chemical structures from <http://www.chemspider.com>
